# Supplementary material for: Major Psychiatric Disorders, Substance Use Behaviors, and Longevity
Source: PubMed Central journal article supplement (PMC11195603; doi:10.1001/jamapsychiatry.2024.1429), 2024-06-18
Supplement: jamapsychiatry-e241429-s003.pdf [file jamapsychiatry-e241429-s003.pdf]

## Data Sharing Statement

Rosoff. Major Psychiatric Disorders, Substance Use Behaviors, and Longevity. *JAMA Psychiatry*. Published June 18, 2024. doi:10.1001/jamapsychiatry.2024.1429

### Data

**Data available:** Yes

**Data types:** Other (please specify)

**Additional Information:** Data used in the study is available and we provide links to the sources. Full data to replicate the study findings are presented in the Supplement.

**How to access data:** We provide URLs to the source data and the data required to replicate the study findings are presented in the Supplement.

**When available:** With publication

### Supporting Documents

**Document types:** Statistical/analytic code

**How to access documents:** We have provided URLs for each of the software packages used for the analyses in the study. We also make additional code - e.g., analysis pipelines - available upon request to the corresponding author.

**When available:** With publication

### Additional Information

**Who can access the data:** Anyone requesting the data

**Types of analyses:** Any purpose.

**Mechanisms of data availability:** Investigator support.
